# Supplementary material for: Oncologist uptake of comprehensive genomic profile guided targeted therapy
Source: PubMed Central journal article supplement (PMC6659802; doi:10.18632/oncotarget.27047), 2019-07-23
Supplement: oncotarget-10-4616-s001.pdf [file oncotarget-10-4616-s001.pdf]

## **Oncologist uptake of comprehensive genomic profile guided targeted therapy**

### **SUPPLEMENTARY MATERIALS**

**Supplementary Table 1: Number of variants per test by level of evidence for therapeutic association(s) ( $n = 620$ ).** See Supplementary\_Table\_1

**Supplementary Table 2: CGP guidance and targeted therapy decisions by evidence group and treatment history status: Tests with variants supported by level 1 or level 2 evidence ( $n = 176$ ), and tests with level 3 variants resulting in targeted therapy given off-label or in a clinical trial ( $n = 24$ ).** See Supplementary\_Table\_2
